# Supplementary material
Source: MDPI journal article supplement (https://www.mdpi.com/2312-7481/9/7/165)
Supplement: s1 [file s1]

# NMR Magnetic Shielding in Transition Metal Compounds Containing Cadmium, Platinum, and Mercury

Andy D. Zapata-Escobar<sup>1,2</sup> , Alejandro F. Maldonado<sup>2</sup> , Jose L. Mendoza-Cortes<sup>3</sup>  and Gustavo A. Aucar<sup>1,2</sup> \*

<sup>1</sup> Natural and Exact Science Faculty, National Northeastern University of Argentina, Avda. Libertad 5460, Corrientes, Argentina

<sup>2</sup> Institute of Modeling and Innovative Technology (CONICET-UNNE), Corrientes, Argentina

<sup>3</sup> Department of Chemical Engineering & Materials Science, Michigan State University, East Lansing, Michigan 48824, United States.

\* Correspondence: gaaucar@conicet.com.ar

In this document we shall present:

- The perturbative Hamiltonians used in the LRESC model within the SI system of units.
- Contributions of the different relativistic corrections to the shielding in some of the studied systems.
- Cartesian coordinates of the molecules studied.

We adopted a nomenclature in which blue and red colors indicate shielding and deshielding effects, respectively.

## 1. Perturbative Hamiltonians used in the LRESC model

The paramagnetic relativistic corrections that depend of the nuclear spin,  $\mu_k$ , are the following[1–3]

$$H^{PSO} = \frac{e}{m} \frac{\mu_0}{4\pi} \left( \frac{\mu_k L_k}{r_k^3} \right) \quad (S1)$$

$$H^{FC} = \frac{e}{2m} \frac{8\pi}{3} \frac{\mu_0}{4\pi} (\mu_k \sigma \delta(r_k)) \quad (S2)$$

$$H^{SD} = \frac{e}{2m} \frac{\mu_0}{4\pi} \left( \frac{3(\mu_k r_k) r_k - r_k^2 \mu_k}{r_k^5} \right) \quad (S3)$$

$$(S4)$$

while those depending on the external magnetic field,  $B$ , are written as

$$H^{OZ} = \frac{e}{2m} (BL_0) \quad (S5)$$

$$H^{SZ-K} = -\frac{e}{8m^2 c^2} [3(\sigma B)p^2 - (\sigma p)(pB)] \quad (S6)$$

$$H^{BSO} = \frac{e}{4m^2 c^2} (\nabla V_c \times [B \times r_0]) \quad (S7)$$

The perturbative Hamiltonian corresponding to the one-body spin–orbit coupling and those scalar relativistic corrections known as Mass-velocity (Mv) and Darwin (Dw) are written as

**Citation:** Zapata-Escobar A.; Maldonado A.; Mendoza-Cortes J.; Aucar A. *Magnetochemistry* **2023**, *9*, 165. <https://doi.org/10.3390/magnetochemistry9070165>

Received: 22 May 2023

Revised: 23 June 2023

Accepted: 25 June 2023

Published: 27 June 2023

**Copyright:** © 2023 by the authors. Submitted to *Magnetochemistry* for possible open access publication under the terms and conditions of the Creative Commons Attribution (CC BY) license (<https://creativecommons.org/licenses/by/4.0/>).

$$H^{SO(1)} = \frac{1}{4m^2c^2} \sigma(\nabla V_C \times p) \quad (S8)$$

$$H^{Mv} = -\frac{1}{8m^3c^2} p^4 \quad (S9)$$

$$H^{Dw} = \frac{1}{4m^2c^2} \nabla^2 V_c \quad (S10)$$

The expressions of the diamagnetic Hamiltonians that contribute to the LRESC model are

$$H^{Dia} = \frac{e}{2mc} \frac{\mu_0}{4\pi} \left[ (\mu_k B) \left( \frac{r_k r_0}{r_k^3} \right) - (\mu_k r_0) \left( \frac{r_k B}{r_k^3} \right) \right] \quad (S11)$$

$$H^{Dia-K} = -\frac{1}{4m^3c^4} \left[ 2 \left( \frac{\mu_M L_M}{r_M^3} \right) (B L_M) + B B_M + 2(A_M A_B) p^2 + 2\pi(\mu_M B) \delta(r_M) \right] \quad (S12)$$

where  $\sigma$  are the Pauli matrices,  $\mu_0$  is the vacuum permeability,  $c$  is the velocity of light in vacuum,  $r_k$  and  $r_0$  are the positions with respect to the nuclear position ( $r - R_k$ ) and the gauge origin ( $r - R_0$ ), respectively.  $L_k$  and  $L_0$  are the corresponding angular momenta.  $p = -i\nabla$  is the linear momentum operator and  $e$  and  $m$  are the charge and mass of the electron. Furthermore,  $A_{\mu_k}$  and  $A_B$  are the potential vector operators associated with the nuclear spin and the external magnetic field given in Equations S13 and S14, respectively.

$$A_{\mu_k} = \frac{\mu_k \times r_k}{r_k^3} \quad (S13)$$

$$A_B = \frac{B \times r_0}{2} \quad (S14)$$

## 2. Relativistic corrections to the shieldings of the molecules of interest

### 2.1. $PtX_i^{-2}$

**Table S1.** Isotropic values of the LRESC mechanisms with localized molecular orbital over the Pt in the  $PtCl_4^{-2}$ . The theory level is HF/cv3z and the gauge is on Pt. All values are reported in ppm.

|                    | Core(Pt) | 4xCore(Cl) | 4xPt-Cl | 4xLP <sub>σ</sub> Cl | 8xLP <sub>π</sub> Cl | Σ        |
|--------------------|----------|------------|---------|----------------------|----------------------|----------|
| $\sigma_d^{NL}$    | -3034.6  | -0.4       | 0.0     | 0.6                  | 0.0                  | -3034.5  |
| $\sigma_d^{NR}$    | 9378.2   | 162.6      | 27.9    | 47.8                 | 62.4                 | 9678.8   |
| $\sigma^{OZ-K}$    | 533.6    | 0.0        | 0.2     | 0.6                  | -1.0                 | 533.5    |
| $\sigma^{PSO-K}$   | 511.4    | 0.5        | 38.7    | 344.6                | 10.0                 | 905.1    |
| $\sigma_p^{Mv+Dw}$ | -1872.2  | 3.7        | -104.8  | -861.8               | 71.7                 | -2763.4  |
| $\sigma^{SO(1)}$   | 2005.2   | -2.6       | -8.9    | -164.3               | -71.6                | 1757.8   |
| $\sigma^{ligand}$  | 1177.9   | 1.7        | -74.7   | -680.9               | 9.0                  | 433.0    |
| $\sigma_p^{core}$  | 6574.9   | 0.0        | 0.1     | 0.4                  | 0.0                  | 6575.4   |
| $\sigma_p^{NR}$    | -14195.5 | -326.3     | 116.5   | 807.3                | 582.7                | -13015.3 |

**Table S2.** Isotropic values of the LRESC mechanisms with localized molecular orbital over the Pt in the  $\text{PtBr}_4^{-2}$ . The theory level is HF/cv3z and the gauge is on Pt. All values are reported in ppm.

|                    | Core(Pt) | 4xCore(Br) | 4xPt-Br | 4xLP $_{\sigma}$ Br | 8xLP $_{\pi}$ Br | $\Sigma$ |
|--------------------|----------|------------|---------|---------------------|------------------|----------|
| $\sigma_d^{NL}$    | -3034.4  | -2.3       | 0.3     | 0.0                 | 0.0              | -3036.5  |
| $\sigma_d^{NR}$    | 9377.6   | 432.7      | 47.0    | 27.2                | 58.7             | 9943.2   |
| $\sigma^{OZ-K}$    | 533.2    | 3.6        | 0.8     | 0.6                 | -3.5             | 534.7    |
| $\sigma^{PSO-K}$   | 439.9    | 1.5        | 387.4   | 24.6                | 15.7             | 869.1    |
| $\sigma_p^{Mv+Dw}$ | -2179.1  | 11.2       | -1030.0 | -54.5               | -1.0             | -3253.3  |
| $\sigma^{SO(1)}$   | 1634.3   | -26.0      | -169.7  | 15.0                | 61.1             | 1514.6   |
| $\sigma^{ligand}$  | 428.4    | -9.7       | -811.5  | -14.4               | 72.2             | -335.0   |
| $\sigma_p^{core}$  | 6575.0   | 0.0        | 0.7     | 0.0                 | 0.0              | 6575.7   |
| $\sigma_p^{NR}$    | -12309.4 | -367.3     | 903.6   | 75.4                | 396.0            | -11301.7 |

**Table S3.** Isotropic values of the LRESC mechanisms with localized molecular orbital over the Pt in the  $\text{PtCl}_6^{-2}$ . The theory level is HF/cv3z and the gauge is on Pt. All values are reported in ppm.

|                    | Core(Pt) | 6xCore(Cl) | 6xPt-Cl | 6xLP $_{\sigma}$ Cl | 12xLP $_{\pi}$ Cl | $\Sigma$ |
|--------------------|----------|------------|---------|---------------------|-------------------|----------|
| $\sigma_d^{NL}$    | -3033.8  | -0.6       | -0.3    | -0.2                | 0.0               | -3035.0  |
| $\sigma_d^{NR}$    | 9353.1   | 238.8      | 78.8    | 42.7                | 92.3              | 9805.7   |
| $\sigma^{OZ-K}$    | 535.2    | 0.2        | 1.6     | 0.5                 | -2.1              | 535.3    |
| $\sigma^{PSO-K}$   | 682.4    | -0.7       | 327.3   | 10.8                | -42.6             | 977.1    |
| $\sigma_p^{Mv+Dw}$ | -2912.5  | -14.1      | -1248.0 | -118.2              | -78.6             | -4371.5  |
| $\sigma^{SO(1)}$   | 1151.7   | -0.5       | 3.0     | 23.1                | -7.7              | 1169.6   |
| $\sigma^{ligand}$  | -543.3   | -15.2      | -916.2  | -83.8               | -131.0            | -1689.5  |
| $\sigma_p^{core}$  | 6574.0   | 0.0        | 0.1     | -0.1                | 0.0               | 6574.0   |
| $\sigma_p^{NR}$    | -18363.7 | -252.9     | 2130.8  | 99.3                | 2042.7            | -14343.9 |

**Table S4.** Isotropic values of the LRESC mechanisms with localized molecular orbital over the Pt in the  $\text{PtBr}_6^{-2}$ . The theory level is HF/cv3z and the gauge is on Pt. All values are reported in ppm.

|                    | Core(Pt) | 6xCore(Br) | 6xPt-Br | 6xLP $_{\sigma}$ Br | 12xLP $_{\pi}$ Br | $\Sigma$ |
|--------------------|----------|------------|---------|---------------------|-------------------|----------|
| $\sigma_d^{NL}$    | -3033.7  | -3.3       | -0.7    | 0.0                 | 0.0               | -3037.7  |
| $\sigma_d^{NR}$    | 9352.0   | 626.3      | 78.7    | 41.3                | 86.4              | 10184.7  |
| $\sigma^{OZ-K}$    | 533.9    | 5.2        | 1.8     | 1.1                 | -5.9              | 536.0    |
| $\sigma^{PSO-K}$   | 549.5    | 2.8        | 325.8   | 6.7                 | -39.2             | 845.6    |
| $\sigma_p^{Mv+Dw}$ | -2770.0  | 15.0       | -1257.7 | -29.3               | -172.3            | -4214.4  |
| $\sigma^{SO(1)}$   | 1108.1   | -21.9      | 86.7    | 15.9                | 173.0             | 1361.8   |
| $\sigma^{ligand}$  | -578.5   | 1.1        | -843.5  | -5.6                | -44.4             | -1470.9  |
| $\sigma_p^{core}$  | 6573.8   | 0.0        | 1.0     | -0.4                | 0.0               | 6574.4   |
| $\sigma_p^{NR}$    | -14849.8 | -576.1     | 2164.6  | 47.9                | 1853.0            | -11360.3 |

2.2.  $\text{Cl}_2\text{XTe}_2\text{Y}_2\text{H}_6$ **Table S5.** Isotropic values of the LRESC mechanisms with localized molecular orbital over the  $\text{Te}_1$  in the  $\text{Cl}_2\text{CdTe}_2\text{N}_2\text{H}_6$ . The theory level is HF/cv3z and the gauge is on  $\text{Te}_1$ . All values are reported in ppm.

|                    | Core( $\text{Te}_1$ ) | Cd- $\text{Te}_1$ | LP $_{\pi}\text{Te}_1$ | others <sup>1</sup> | $\Sigma$ |
|--------------------|-----------------------|-------------------|------------------------|---------------------|----------|
| $\sigma_d^{NL}$    | -892.7                | 0.5               | 1.9                    | -1.8                | -892.1   |
| $\sigma_d^{NR}$    | 5306.3                | 16.7              | 37.4                   | 380.3               | 5740.8   |
| $\sigma^{OZ-K}$    | 132.5                 | 0.6               | 1.4                    | 2.7                 | 137.2    |
| $\sigma^{PSO-K}$   | -0.2                  | 231.6             | 514.9                  | -48.3               | 698.0    |
| $\sigma_p^{Mv+Dw}$ | -108.8                | -407.6            | -868.2                 | -13.5               | -1398.1  |
| $\sigma^{SO(1)}$   | -74.5                 | 548.9             | 687.4                  | 31.5                | 1193.3   |
| $\sigma^{ligand}$  | -51.0                 | 373.6             | 335.6                  | -27.7               | 630.5    |
| $\sigma_p^{core}$  | 1925.6                | 1.5               | 8.6                    | -0.1                | 1935.5   |
| $\sigma_p^{NR}$    | 1.4                   | -1645.4           | -3645.7                | -40.9               | -5330.7  |

<sup>1</sup> Contribution from others LMOs.**Table S6.** Isotropic values of the LRESC mechanisms with localized molecular orbital over the  $\text{Te}_1$  in the  $\text{Cl}_2\text{CdTe}_2\text{P}_2\text{H}_6$ . The theory level is HF/cv3z and the gauge is on  $\text{Te}_1$ . All values are reported in ppm.

|                    | Core( $\text{Te}_1$ ) | Cd- $\text{Te}_1$ | LP $_{\pi}\text{Te}_1$ | others <sup>1</sup> | $\Sigma$ |
|--------------------|-----------------------|-------------------|------------------------|---------------------|----------|
| $\sigma_d^{NL}$    | -889.7                | 0.4               | -1.2                   | -1.8                | -892.2   |
| $\sigma_d^{NR}$    | 5122.9                | 16.2              | 220.5                  | 417.8               | 5777.3   |
| $\sigma^{OZ-K}$    | 125.2                 | 0.7               | 8.4                    | 3.1                 | 137.4    |
| $\sigma^{PSO-K}$   | 11.1                  | 108.4             | 149.6                  | -46.1               | 223.1    |
| $\sigma_p^{Mv+Dw}$ | -64.7                 | -198.3            | -274.3                 | 11.0                | -526.3   |
| $\sigma^{SO(1)}$   | 16.9                  | 129.2             | 113.4                  | -0.7                | 258.7    |
| $\sigma^{ligand}$  | 88.5                  | 40.0              | -2.8                   | -32.8               | 92.9     |
| $\sigma_p^{core}$  | 1929.0                | 0.7               | 3.3                    | -0.1                | 1933.0   |
| $\sigma_p^{NR}$    | 0.7                   | -768.4            | -1133.9                | -82.5               | -1984.1  |

<sup>1</sup> Contribution from others LMOs.

**Table S7.** Isotropic values of the LRESC mechanisms with localized molecular orbital over the Te<sub>1</sub> in the Cl<sub>2</sub>HgTe<sub>2</sub>N<sub>2</sub>H<sub>6</sub>. The theory level is HF/cv3z and the gauge is on Te<sub>1</sub>. All values are reported in ppm.

|                    | Core(Te <sub>1</sub> ) | Hg-Te <sub>1</sub> | LP <sub>π</sub> Te <sub>1</sub> | others <sup>1</sup> | Σ       |
|--------------------|------------------------|--------------------|---------------------------------|---------------------|---------|
| $\sigma_d^{NL}$    | -892.6                 | 0.3                | 1.8                             | -4.1                | -894.5  |
| $\sigma_d^{NR}$    | 5305.8                 | 16.8               | 37.9                            | 482.3               | 5842.8  |
| $\sigma^{OZ-K}$    | 132.3                  | 0.6                | 1.5                             | 6.2                 | 140.7   |
| $\sigma^{PSO-K}$   | -0.6                   | 253.5              | 536.4                           | -47.8               | 741.5   |
| $\sigma_p^{Mv+Dw}$ | 636.2                  | -851.6             | -1101.4                         | -166.5              | -1483.3 |
| $\sigma^{SO(1)}$   | -37.7                  | 357.3              | 463.3                           | 556.8               | 1339.8  |
| $\sigma^{ligand}$  | 730.2                  | -240.0             | -100.2                          | 348.6               | 738.6   |
| $\sigma_p^{core}$  | 1924.6                 | 1.1                | 9.4                             | 0.2                 | 1935.4  |
| $\sigma_p^{NR}$    | 3.9                    | -1800.6            | -3798.1                         | -117.7              | -5712.5 |

<sup>1</sup> Contribution from others LMOs.

**Table S8.** Isotropic values of the LRESC mechanisms with localized molecular orbital over the Te<sub>1</sub> in the Cl<sub>2</sub>HgTe<sub>2</sub>N<sub>2</sub>H<sub>6</sub>. The theory level is HF/cv3z and the gauge is on Te<sub>1</sub>. All values are reported in ppm.

|                    | Core(Te <sub>1</sub> ) | Hg-Te <sub>1</sub> | LP <sub>π</sub> Te <sub>1</sub> | others <sup>1</sup> | Σ       |
|--------------------|------------------------|--------------------|---------------------------------|---------------------|---------|
| $\sigma_d^{NL}$    | -892.6                 | 0.3                | 1.9                             | -4.1                | -894.6  |
| $\sigma_d^{NR}$    | 5306.4                 | 16.2               | 37.0                            | 520.3               | 5879.8  |
| $\sigma^{OZ-K}$    | 129.4                  | 0.8                | 4.2                             | 6.7                 | 141.0   |
| $\sigma^{PSO-K}$   | -0.1                   | 109.2              | 154.5                           | -44.7               | 218.9   |
| $\sigma_p^{Mv+Dw}$ | 197.4                  | -281.6             | -468.1                          | 7.3                 | -545.0  |
| $\sigma^{SO(1)}$   | -8.7                   | 67.5               | 99.1                            | 71.4                | 229.3   |
| $\sigma^{ligand}$  | 317.9                  | -104.1             | -210.3                          | 40.7                | 44.3    |
| $\sigma_p^{core}$  | 1925.2                 | 0.4                | 7.2                             | 0.4                 | 1933.2  |
| $\sigma_p^{NR}$    | 0.6                    | -774.0             | -1090.1                         | -168.9              | -2032.4 |

<sup>1</sup> Contribution from others LMOs.

### 3. Cartesian coordinates

#### $\text{CdCl}_2\text{Te}_2\text{N}_2\text{H}_6$

|    |               |               |               |
|----|---------------|---------------|---------------|
| Cd | 0.0000000000  | 0.0000000000  | 0.0000000000  |
| Cl | -1.4436897967 | -1.0531752215 | 1.7310650646  |
| Cl | 1.410619733   | 2.0014815406  | 0.4363485975  |
| Te | 2.2461715236  | -1.6755329392 | -1.0555009416 |
| Te | -2.1971106183 | 0.3318355078  | -2.0046565929 |
| N  | 3.6590609411  | -0.0769988314 | -0.5697595829 |
| N  | -3.6405714491 | -0.4105653106 | -0.5376980956 |
| H  | -3.1388535503 | -0.7021542837 | 0.2927560169  |
| H  | -4.2907170372 | 0.3052626227  | -0.2841429069 |
| H  | -4.1485352983 | -1.1918636258 | -0.8990890286 |
| H  | 4.2920140767  | -0.3671062227 | 0.1475975744  |
| H  | 3.1388384122  | 0.7264655311  | -0.2379064631 |
| H  | 4.1875242686  | 0.1904924048  | -1.3748880582 |

#### $\text{CdCl}_2\text{Te}_2\text{P}_2\text{H}_6$

|    |               |               |               |
|----|---------------|---------------|---------------|
| Cd | 0.0000000000  | 0.0000000000  | 0.0000000000  |
| Cl | -1.4021917857 | -0.7913567967 | 1.8564329319  |
| Cl | 1.3915059543  | 2.0213393273  | -0.1075551982 |
| Te | 2.1681679841  | -2.0019355257 | -0.7503327647 |
| Te | -2.1526969141 | -0.0437463701 | -2.1532432566 |
| P  | 3.8142695452  | -0.2472629372 | -0.8113866603 |
| P  | -3.8065796800 | -0.7018964634 | -0.5336339933 |
| H  | -3.6279167004 | -1.9370551237 | 0.0631028479  |
| H  | -4.0063103317 | 0.1669255700  | 0.5240648462  |
| H  | -5.0624672552 | -0.8006169533 | -1.1188842223 |
| H  | 4.0003123986  | 0.4577790600  | 0.3640914658  |
| H  | 3.6391065603  | 0.7290863936  | -1.7754644697 |
| H  | 5.0751964936  | -0.759037519  | -1.0898252126 |

|                                                                 |              |              |              |
|-----------------------------------------------------------------|--------------|--------------|--------------|
| HgCl <sub>2</sub> Te <sub>2</sub> N <sub>2</sub> H <sub>6</sub> |              |              |              |
| Hg                                                              | 0.000000000  | 0.000000000  | 0.000000000  |
| Cl                                                              | -1.666937928 | -1.690332677 | -0.690746315 |
| Cl                                                              | 1.416251124  | 0.041209794  | 2.053079192  |
| Te                                                              | 2.210390976  | 0.758601769  | -1.860770373 |
| Te                                                              | -2.052867560 | 2.283607231  | -0.039289475 |
| N                                                               | 3.590637509  | 0.859413663  | -0.151689453 |
| N                                                               | -3.659310267 | 0.843554076  | -0.467267824 |
| H                                                               | -4.561871260 | 1.265581697  | -0.365614816 |
| H                                                               | -3.579867675 | 0.490950507  | -1.397744569 |
| H                                                               | -3.598099956 | 0.050921260  | 0.141439734  |
| H                                                               | 4.534219265  | 0.952097947  | -0.465973561 |
| H                                                               | 3.493613244  | 0.034244833  | 0.420522597  |
| H                                                               | 3.341355162  | 1.632350029  | 0.444805492  |
| HgCl <sub>2</sub> Te <sub>2</sub> P <sub>2</sub> H <sub>6</sub> |              |              |              |
| Hg                                                              | 0.000000000  | 0.000000000  | 0.000000000  |
| Cl                                                              | -1.558571551 | -1.805418959 | -0.574873680 |
| Cl                                                              | 1.357318126  | 0.265499219  | 2.066867328  |
| Te                                                              | 2.184712546  | 0.503209542  | -1.999065442 |
| Te                                                              | -2.004892489 | 2.338962096  | -0.263788701 |
| P                                                               | 3.814209115  | 0.744023333  | -0.249320435 |
| P                                                               | -3.839380873 | 0.797706350  | -0.534629011 |
| H                                                               | -5.052862312 | 1.471047280  | -0.607546033 |
| H                                                               | -3.823515527 | 0.036694997  | -1.695571184 |
| H                                                               | -4.029677369 | -0.123842608 | 0.488059995  |
| H                                                               | 5.075374992  | 0.962502590  | -0.789452536 |
| H                                                               | 3.982101229  | -0.343077350 | 0.585011530  |
| H                                                               | 3.634988844  | 1.816343371  | 0.609805083  |

## References

1. Melo, J.I.; Ruiz de Azúa, M.C.; Giribet, C.G.; Aucar, G.A.; Romero, R.H. Relativistic effects on the nuclear magnetic shielding tensor. *J. Chem. Phys.* **2003**, *118*, 471–486.
2. Aucar, G.A.; Melo, J.I.; Aucar, I.A.; Maldonado, A.F. Foundations of the LRESC model for response properties and some applications. *Int. J. Quantum Chem.* **2018**, *118*, e25487.
3. Melo, J.I.; Ruiz de Azúa, M.C.; Giribet, C.G.; Aucar, G.A.; Provasi, P.F. Relativistic effects on nuclear magnetic shielding constants in HX and CH<sub>3</sub>X(X=Br,I) based on the linear response within the elimination of small component approach. *J. Chem. Phys.* **2004**, *121*, 6798–6808.

**Disclaimer/Publisher's Note:** The statements, opinions and data contained in all publications are solely those of the individual author(s) and contributor(s) and not of MDPI and/or the editor(s). MDPI and/or the editor(s) disclaim responsibility for any injury to people or property resulting from any ideas, methods, instructions or products referred to in the content.
